# Supplementary material for: Mechanisms of Action of Extracorporeal Photopheresis in the Control of Bronchiolitis Obliterans Syndrome (BOS): Involvement of Circulating miRNAs
Source: MDPI journal article supplement (doi:10.3390/cells11071117), 2022-03-25
Supplement: s1 [file s1]

**Table S1:** Overall results of miRNAs expression levels in studied population expressed in log2 transformed values

| miRNAs          | Controls |               |               | pre-ECP |               |               | 6-months |               |               | Adjusted <i>p</i> -value |                     |
|-----------------|----------|---------------|---------------|---------|---------------|---------------|----------|---------------|---------------|--------------------------|---------------------|
|                 | Median   | Percentile 25 | Percentile 75 | Median  | Percentile 25 | Percentile 75 | Median   | Percentile 25 | Percentile 75 | BOS vs CTR               | Pre-ECP vs 6-months |
| hsa-miR-155-5p  | 3.74     | 2.82          | 4.98          | -3.19   | -4.37         | -2.18         | -0.69    | -1.97         | 0.48          | <0.0001                  | <0.0001             |
| hsa-miR-146a-5p | 10.89    | 7.78          | 11.81         | 2.47    | 0.62          | 7.36          | 4.47     | 3.68          | 7.79          | <0.0001                  | >0.9999             |
| hsa-miR-31-5p   | -2.84    | -3.64         | 1.37          | -6.02   | -7.95         | -2.61         | -6.65    | -7.69         | -4.42         | 0.015                    | >0.9999             |
| hsa-miR-21-5p   | 10.29    | 9.17          | 11.83         | 8.85    | 6.85          | 10.53         | 8.46     | 6.77          | 9.97          | 0.199                    | >0.9999             |
| hsa-miR-223-5p  | 3.41     | 2.76          | 5.23          | 4.30    | 2.60          | 5.24          | 4.72     | 2.54          | 6.40          | >0.9999                  | >0.9999             |
| hsa-miR-125a-5p | 3.54     | 2.81          | 3.97          | 3.37    | 2.08          | 5.79          | 4.96     | 2.94          | 6.48          | >0.9999                  | >0.9999             |
| hsa-miR-30b-5p  | 5.21     | 3.97          | 6.80          | 5.92    | 3.44          | 6.30          | 5.89     | 3.94          | 7.15          | >0.9999                  | >0.9999             |
| hsa-miR-24-3p   | 4.13     | 3.54          | 4.56          | 5.25    | 3.89          | 5.90          | 8.13     | 6.18          | 12.51         | >0.9999                  | >0.9999             |
| hsa-miR-98-5p   | -0.44    | -0.59         | -0.13         | 1.72    | -0.72         | 2.42          | 1.01     | 0.33          | 3.07          | >0.9999                  | >0.9999             |
| hsa-miR-99a-5p  | -3.07    | -3.80         | -2.99         | -2.33   | -2.51         | -1.80         | -1.95    | -2.67         | -1.39         | >0.9999                  | >0.9999             |
| hsa-miR-23b-3p  | 7.68     | 6.50          | 9.09          | 7.91    | 6.41          | 9.14          | 2.85     | 2.17          | 6.31          | >0.9999                  | <0.0001             |
| hsa-miR-182-5p  | 1.84     | 1.15          | 2.22          | -0.49   | -1.83         | 1.39          | -0.74    | -1.48         | 1.33          | >0.9999                  | >0.9999             |
| hsa-miR-17-5p   | 7.55     | 6.88          | 8.04          | 5.32    | 1.64          | 6.47          | 4.37     | 1.82          | 6.00          | 0.635                    | >0.9999             |
| hsa-miR-181a-3p | -4.36    | -5.60         | -2.45         | -3.14   | -3.75         | -2.60         | -3.17    | -4.09         | -2.94         | >0.9999                  | >0.9999             |

**Table S2.** Pathways predicted by DIANA-mirPath analysis.

| KEGG pathway<br>hsa-miR-23b; hsa-miR-155 | p-value  | genes                                                                                    |
|------------------------------------------|----------|------------------------------------------------------------------------------------------|
| TGF-beta signaling pathway               | <0.00001 | THBS1<br>SMAD3<br>SMAD4<br>SMAD5<br>SP1<br>SMAD1                                         |
| Steroid biosynthesis                     | <0.00001 | DHCR24<br>CYP51A1                                                                        |
| Adherens junction                        | 0.0003   | MET<br>CTNND1<br>SMAD3<br>EGFR<br>TJP1<br>SMAD4<br>CTNNB1<br>PTPRJ                       |
| Hippo signaling pathway                  | 0.0007   | YWHAE<br>PPP1CC<br>SMAD3<br>MPP5<br>CCND1<br>SMAD4<br>CTNNB1<br>MOB1A<br>SMAD1<br>PPP1CB |
| FoxO signaling pathway                   | 0.0007   | STAT3<br>PCK2                                                                            |

|                                                          |        |                                                                                              |
|----------------------------------------------------------|--------|----------------------------------------------------------------------------------------------|
|                                                          |        | <b>SMAD3</b><br>EGFR<br>CCND1<br><b>SMAD4</b><br>FOXO3<br>PLK1<br>SGK3<br>MDM2               |
| ECM-receptor interaction                                 | 0.0011 | ITGB1<br>THBS1<br>COL4A2                                                                     |
| Hepatitis B                                              | 0.0013 | <b>STAT3</b><br><b>SMAD3</b><br>BCL2<br>MAVS<br>MYD88<br>CCND1<br><b>SMAD4</b><br>E2F3       |
| Apoptosis                                                | 0.0065 | BCL2<br>MYD88<br>MAP3K14<br>TNFRSF10B<br>PRKAR1A<br>XIAP                                     |
| Non-small cell lung cancer                               | 0.0065 | EML4<br>EGFR<br>CCND1<br>E2F3<br>FOXO3                                                       |
| Proteoglycans in cancer                                  | 0.007  | <b>STAT3</b><br>MET<br>ITGB1<br>THBS1<br>PPP1CC<br>EGFR<br>CCND1<br>CTNNB1<br>MDM2<br>PPP1CB |
| Signaling pathways regulating pluripotency of stem cells | 0.0324 | <b>STAT3</b><br><b>SMAD3</b><br><b>SMAD4</b><br>CTNNB1<br>SMAD5<br>IL6ST<br>SMAD1            |
| Colorectal cancer                                        | 0.0324 | <b>SMAD3</b><br>BCL2<br>CCND1<br><b>SMAD4</b><br>CTNNB1                                      |

|                    |        |        |
|--------------------|--------|--------|
| Pathways in cancer | 0.034  | STAT3  |
|                    |        | MET    |
|                    |        | ITGB1  |
|                    |        | SMAD3  |
|                    |        | BCL2   |
|                    |        | EGFR   |
|                    |        | CCND1  |
|                    |        | SMAD4  |
|                    |        | CTNNB1 |
|                    |        | COL4A2 |
|                    |        | E2F3   |
|                    |        | MDM2   |
|                    |        | XIAP   |
| Endometrial cancer | 0.034  | EGFR   |
|                    |        | CCND1  |
|                    |        | CTNNB1 |
|                    |        | FOXO3  |
| Bladder cancer     | 0.0351 | THBS1  |
|                    |        | EGFR   |
|                    |        | CCND1  |
|                    |        | E2F3   |
|                    |        | MDM2   |
